# Supplementary material
Source: PubMed Central journal article supplement (PMC10104790)
Supplement: mmc1.pdf [file mmc1.pdf]

# Study Design

## Gutenberg Prematurity Study (GPS)

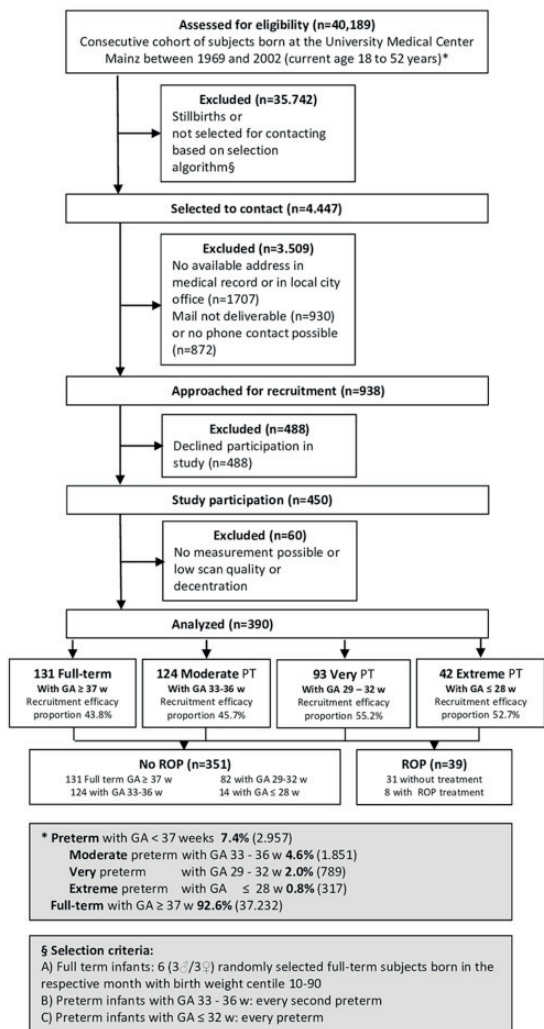

Figure 1 Effective recruitment efficacy proportion of the Gutenberg Prematurity Eye Study (GPES)

Legend: PT – preterm, ROP retinopathy of prematurity
